# Supplementary material for: Differential Sarcomere and Electrophysiological Maturation of Human iPSC-Derived Cardiac Myocytes in Monolayer vs. Aggregation-Based Differentiation Protocols
Source: MDPI journal article supplement (doi:10.3390/ijms18061173), 2017-06-01
Supplement: s1 [file s1]

SUPPLEMENTARY FIGURES

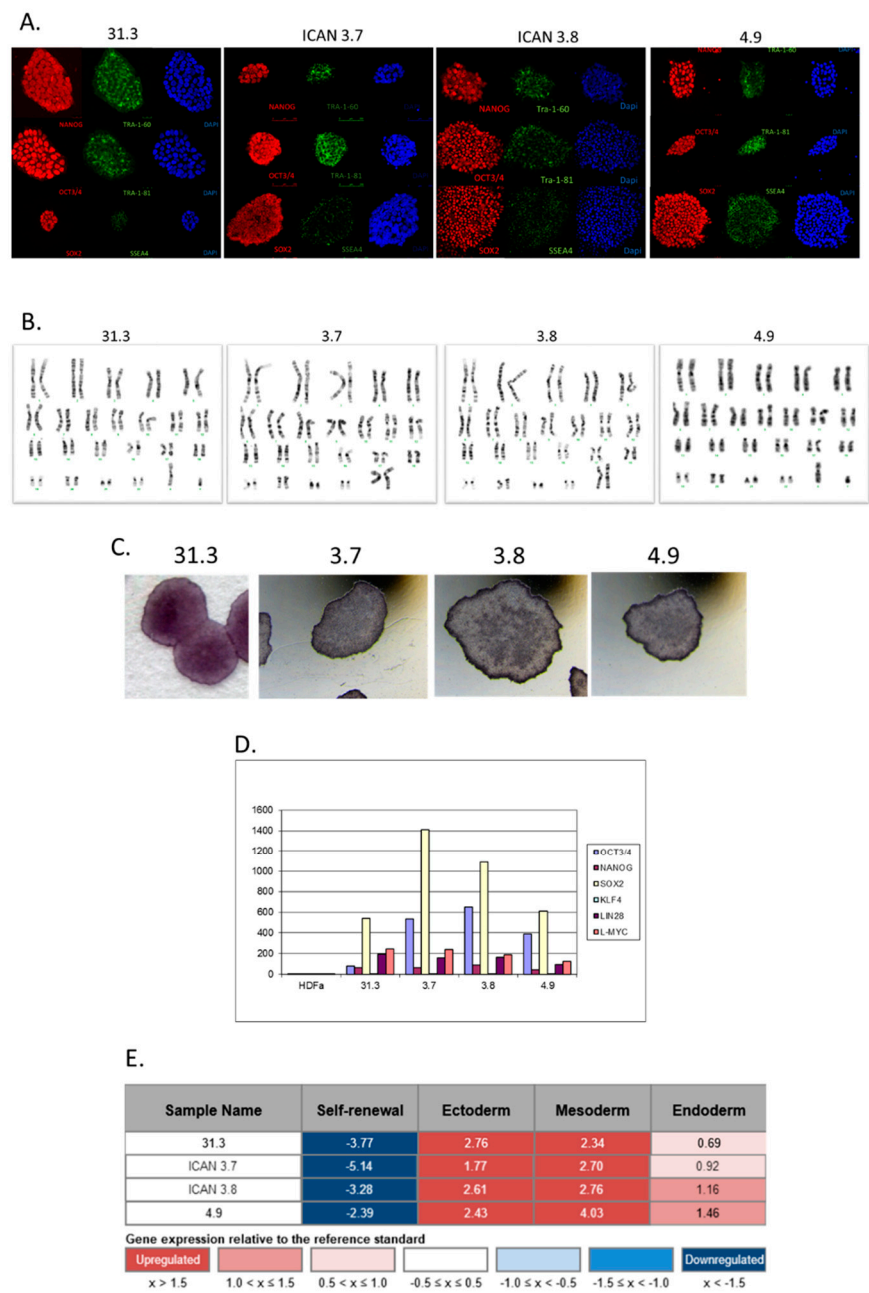

**Figure S1: Pluripotency of iPS control cell lines** **A.** Immunostaining of iPS with antibodies directed against the pluripotency markers NANOG, OCT4, SOX2 (red), TRA1-60 TRA1-81 and SSEA3/4 (green). Nuclei were stained with DAPI (blue). **B.** Normal karyotyping of cell lines **C.** Positive alkaline phosphatase staining **D.** RT-PCR showing the expression of pluripotency genes compared human dermal fibroblasts and control iPS cell line. **E.** Scorecards<sup>TM</sup> analysis assessing pluripotency and trilineage differentiation.

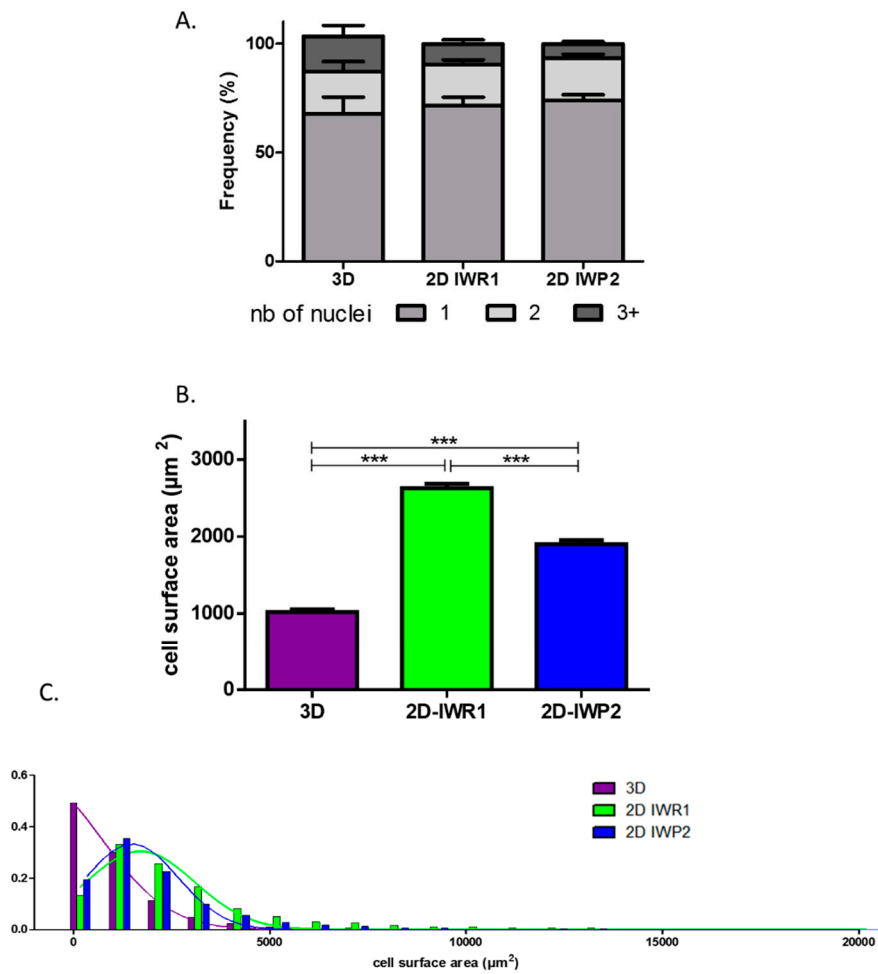

**Figure S2 related to Figure 2: Automated cellular imaging to analyze the cell size and nucleation of the round cells population.** **A.** Frequency of number of nuclei in the round cells for each protocol **B.** Cell size comparison in the round population **C.** Cell size distribution in the three protocols in the round population.

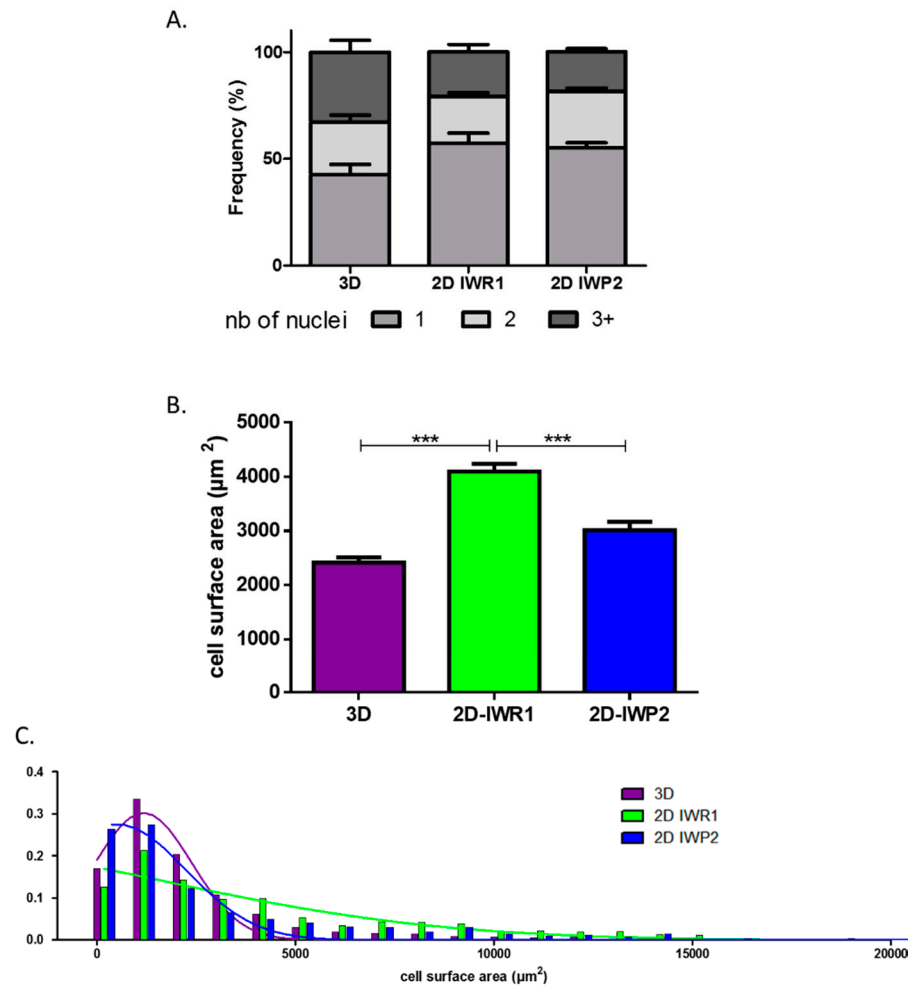

**Figure S3 related to Figure 2: Automated cellular imaging to analyze the cell size and nucleation of the long cells population.** A. Frequency of number of nuclei in the long cells for each protocol B. Cell size comparison in the long cell population C. Cell size distribution in the three protocols in the long population.

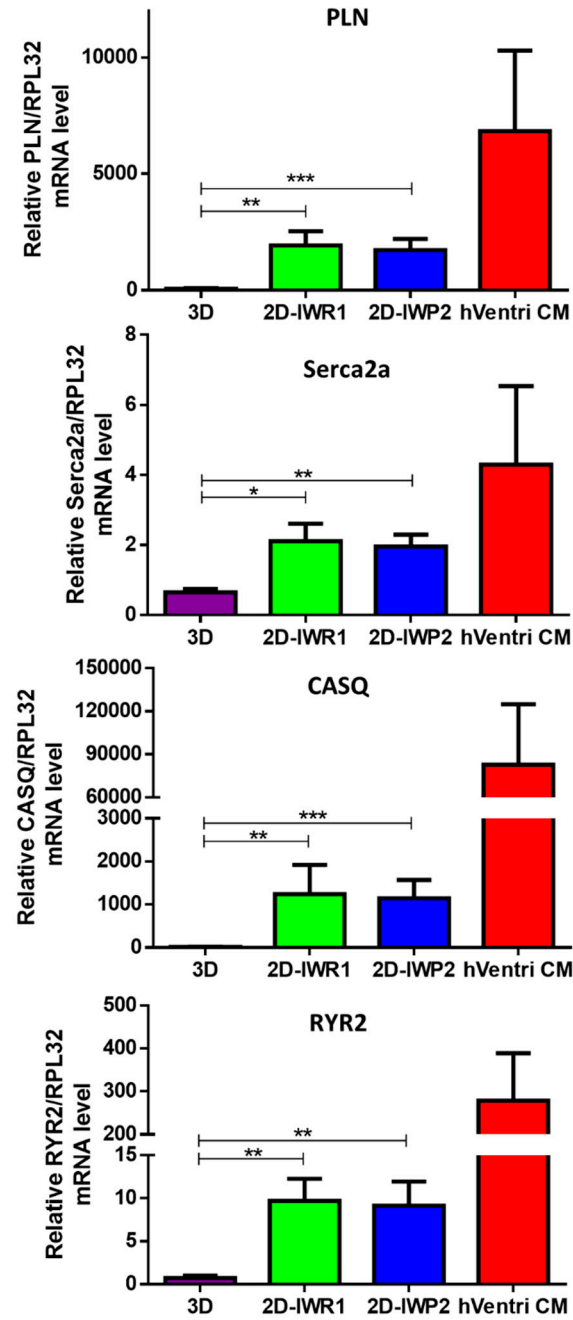

**Figure S4: mRNA expression of calcium cycling proteins.** Quantitative PCR results for the mRNA expression of *PLN*, *CASQ*, *Serca2a*, and *RYR2*. Adult LV tissue was used as a positive control. n=8 to 12 differentiations, \*p<0.05 , \*\*p<0.01, \*\*\*p<0.001

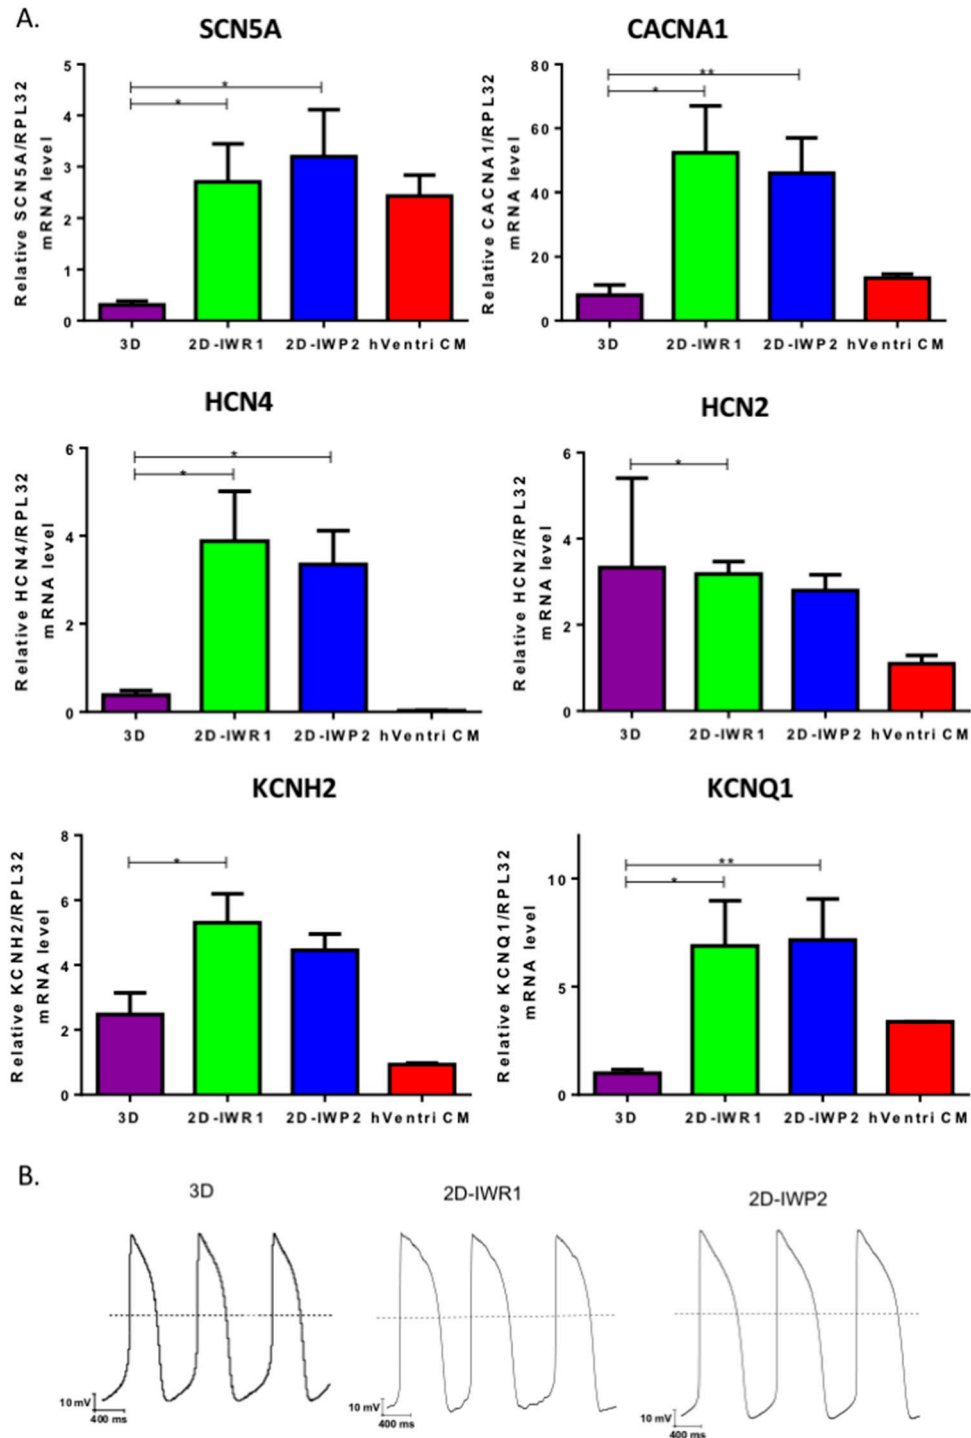

**Figure S5: Action potentials and expression of cardiac ion channels.** **A.** Expression of main human cardiac ion channels. Quantitative PCR results for the expression of *SCN5A*, *CACNA1*, *HCN2*, *HCN4*, *KCNQ1*, and *KCNH2*. Adult LV tissue is used as a positive control. n=8 to 12 differentiations, \*p<0.05, \*\*p<0.01 **B.** Typical action potentials recorded in hiPSC-CM according to differentiation protocols

## SUPPLEMENTARY TABLES

**Table S1: Sequences of primers**

| NAME          | FORWARD SEQUENCE (5' > 3') | REVERSE SEQUENCE (5' > 3') |
|---------------|----------------------------|----------------------------|
| $\alpha$ -MHC | TCTCCGACAACGCCTATCAGTAC    | GTCACCTATGGCTGCAATGCT      |
| $\beta$ -MHC  | GGCAAGACAGTGACCGTGAAG      | CGTAGCGATCCTTGAGGTTGTA     |
| cTNi          | CCAACTACCGCGCTTATGC        | CTCGCTCCAGCTCTTGCTTT       |
| ssTNi         | AACCCAAGATCACTGCCTCCCG     | CGCTTGAACCTCCACGGAGGT      |
| PLN           | CTCACTCGCTCAGCTATAAGAAG    | AGAGAAGCATCACGATGATACAG    |
| SERCA2A       | ACCCACATTTCGAGTTGGAAG      | CAGTGGGTTGTCATGAGTGG       |
| CASQ2         | GAGCTTGTGGCCAGGTCCT        | GATCTCCACTGGGTCTTCAA       |
| RYR2          | GGTGGTCATCGAACACTCCT       | CGAGCAATACAACCTGACCA       |
| KCNH2         | CCCAACACCAACTCAGAGAAGATC   | TAGCATACATGAGGGAGCCAATG    |
| KCNQ1         | GCCTCCTGCTTCTCTGTCTTT      | CTTCTGCCTCTGCTTCTGCT       |
| CACNA1        | CGAAGTAGGTGGAGTTGACCAC     | GCAGGAGTACAAGAACTGTGAGC    |
| HCN2          | ATCCAGTCGCTGGACTCCT        | GATCTTCTGGCGGAAGTCAG       |
| HCN4          | TCTACTCGCTGAGCGTGGACAA     | GAGTTGAGGTCGTGCTGGACTT     |
